# Supplementary material for: The Kavaratamides: Discovery of Linear Lipodepsipeptides from the Marine Cyanobacterium Moorena bouillonii Using a Comparative Chemogeographic Analysis
Source: PubMed Central journal article supplement (PMC11217931; doi:10.1021/acs.jnatprod.4c00242), 2024-06-04
Supplement: np4c00242_si_001.pdf [file np4c00242_si_001.pdf]

# Supporting Information

## The Kavaratamides: Discovery of Linear Lipodepsipeptides from the Marine Cyanobacterium *Moorena bouillonii* using a Comparative Chemogeographic Analysis

*Byeol Ryu,<sup>†</sup> Evgenia Glukhov,<sup>†</sup> Thaiz R. Teixeira,<sup>‡</sup> Conor R. Caffrey,<sup>‡</sup> Saranya Madiyan,<sup>§</sup>  
Valsamma Joseph,<sup>§</sup> Nicole E. Avalon,<sup>†</sup> Christopher A. Leber,<sup>†</sup> C. Benjamin Naman,<sup>†,⊥</sup> and William  
H. Gerwick<sup>\*, †, //</sup>*

<sup>†</sup>Center for Marine Biotechnology and Biomedicine, Scripps Institution of Oceanography,  
University of California San Diego, 9500 Gilman Drive, La Jolla, California 92093, United States.

<sup>‡</sup>Center for Discovery and Innovation in Parasitic Diseases, Skaggs School of Pharmacy and  
Pharmaceutical Sciences, University of California San Diego, 9500 Gilman Drive, La Jolla,  
California 92093, United States.

<sup>§</sup>National Centre for Aquatic Animal Health, Cochin University of Science and Technology,  
Kochi, Kerala 682016, India

<sup>1</sup>Department of Science and Conservation, San Diego Botanic Garden, 300 Quail Gardens Drive, Encinitas, California 92024, United States.

<sup>2</sup>Skaggs School of Pharmacy and Pharmaceutical Sciences, University of California San Diego, 9500 Gilman Drive, La Jolla, California 92093, United States.

Corresponding Author: W. H. Gerwick, email: [wgerwick@health.ucsd.edu](mailto:wgerwick@health.ucsd.edu)

## Table of Contents

|                                                                                                                                                                                                                              |    |
|------------------------------------------------------------------------------------------------------------------------------------------------------------------------------------------------------------------------------|----|
| <b>Methods S1.</b> <i>In vitro</i> Anti-trypanosomal assay .....                                                                                                                                                             | 4  |
| <b>Methods S2.</b> Enzymatic assays of <i>T. brucei</i> Cathepsin L-like ( <i>Tbr</i> CATL) and <i>T. cruzi</i> Cruzain (CRZ) proteases .....                                                                                | 5  |
| <b>Table S1.</b> <i>M. bouillonii</i> crude extract sample information .....                                                                                                                                                 | 6  |
| <b>Table S2.</b> Antitrypanosomal activity screening results of kavaratamide A ( <b>1</b> ) .....                                                                                                                            | 7  |
| <b>Figure S1.</b> Map of collection sites of <i>M. bouillonii</i> .....                                                                                                                                                      | 8  |
| <b>Figure S2.</b> Molecular network of 15 <i>M. bouillonii</i> extracts collected from six different locations. ....                                                                                                         | 9  |
| <b>Figure S3.</b> LR-LCMS trace of four different <i>M. bouillonii</i> extracts from India. ....                                                                                                                             | 10 |
| <b>Figure S4.</b> DAD trace of four different <i>M. bouillonii</i> extracts from India .....                                                                                                                                 | 11 |
| <b>Figure S5.</b> (+) HRESIMS spectrum of kavaratamide A ( <b>1</b> ) .....                                                                                                                                                  | 12 |
| <b>Figure S6.</b> UV spectrum of kavaratamide A ( <b>1</b> ) .....                                                                                                                                                           | 13 |
| <b>Figure S7.</b> IR spectrum of kavaratamide A ( <b>1</b> ) (ATR) .....                                                                                                                                                     | 14 |
| <b>Figure S8.</b> MS/MS fragmentation of kavaratamide A ( <b>1</b> ) .....                                                                                                                                                   | 15 |
| <b>Figure S9.</b> Scheme for absolute configuration determination of kavaratamide A ( <b>1</b> ) .....                                                                                                                       | 16 |
| <b>Figure S10.</b> Modified Mosher's ester analysis of kavaratamide A ( <b>1</b> ) .....                                                                                                                                     | 17 |
| <b>Figure S11.</b> (A) Chiral phase chromatographic analysis for Hiva and (B) HPLC chromatogram of advance Marfey's analysis for Val-1, Val-2, and <i>N</i> -Me-Ala. ....                                                    | 18 |
| <b>Figure S12.</b> <sup>1</sup> H NMR spectrum of kavaratamide A ( <b>1</b> ) in CDCl <sub>3</sub> (500 MHz) .....                                                                                                           | 19 |
| <b>Figure S13.</b> <sup>13</sup> C NMR spectrum of kavaratamide A ( <b>1</b> ) in CDCl <sub>3</sub> (125 MHz) .....                                                                                                          | 20 |
| <b>Figure S14.</b> COSY spectrum of kavaratamide A ( <b>1</b> ) in CDCl <sub>3</sub> (500 MHz) .....                                                                                                                         | 21 |
| <b>Figure S15.</b> HSQC spectrum of kavaratamide A ( <b>1</b> ) in CDCl <sub>3</sub> (600 MHz) .....                                                                                                                         | 22 |
| <b>Figure S16.</b> HMBC spectrum of kavaratamide A ( <b>1</b> ) in CDCl <sub>3</sub> (500 MHz) .....                                                                                                                         | 23 |
| <b>Figure S17.</b> NOESY spectrum of kavaratamide A ( <b>1</b> ) in CDCl <sub>3</sub> (500 MHz) .....                                                                                                                        | 24 |
| <b>Figure S18.</b> MS/MS spectra of kavaratamides A–C ( <b>1–3</b> ) .....                                                                                                                                                   | 25 |
| <b>Figure S19.</b> MS/MS spectra of nodes 4–6 .....                                                                                                                                                                          | 26 |
| <b>Figure S20.</b> Kavaratamides MS/MS-based cluster with the sums of the intensities of the precursor ions of each compound used to determine their relative abundance. These sums were used to depict the node sizes. .... | 27 |
| <b>Figure S21.</b> Concentration response curves of cell viability for D283-med cells treated with kavaratamide A ( <b>1</b> ) (top) and positive control quisinostat (bottom). ....                                         | 28 |
| <b>References</b> .....                                                                                                                                                                                                      | 29 |

## Methods S1. *In Vitro* Anti-trypanosomal Assay

*Trypanosoma brucei brucei* Lister 427 was cultured at 37 °C under a humidified 5% CO<sub>2</sub> atmosphere in HMI-9 modified medium (Hirumi and Hirumi 1989) supplemented with 20% heat-inactivated fetal bovine serum (FBS). Kavaratamide A (1) was diluted in DMSO and added to 96-well polystyrene assay plates to give a final assay concentration of 4 μM (1 μL; 0.5% total DMSO). Fresh HMI-9 medium (99 μL/well) was added to the assay plate. Parasites in the exponential phase were suspended at 2 × 10<sup>5</sup> parasites/mL in HMI-9 medium and added to each well (100 μL) to a total density of 2 × 10<sup>4</sup> trypanosomes/well. Assay plates were incubated at 37 °C and 5% CO<sub>2</sub> for 70 h, followed by the addition of 20 μL/well of resazurin 0.5 mM (Faria et al., 2015). The plates were incubated for an additional 2h and fluorescence was measured at 535 nm and 590 nm excitation and emission wavelengths, respectively, using a 2104 EnVision® multilabel plate reader (PerkinElmer, Waltham, MA). The viability of the parasites was normalized to positive and negative controls in each assay plate. The screening was performed in technical quadruplicate, and pentamidine at a fixed concentration of 4 μM was employed as a positive drug control.

## **Methods S2. Enzymatic assays of *T. brucei* cathepsin L (*Tbr*CATL) and *T. cruzi* cruzain (CRZ)**

The recombinant forms of *Tbr*CATL and cruzain were expressed and purified as previously described by Caffrey et al. (2001) and Silva et al. (2019), respectively. Proteolytic activity was measured by monitoring the cleavage of the fluorogenic substrate Z-Phe-Arg-aminomethylcoumarin (Z-FRAMC), in a Synergy HTX (Biotek) fluorimeter. All assays were performed in a 384-well black plate format, at a final volume of 30  $\mu$ L, in a buffer solution of 0.1 M sodium acetate, pH 5.5, containing 1 mM dithiothreitol, 0.01% Triton X-100, 0.5 nM enzyme, and 2.5  $\mu$ M substrate. The assay was performed after a 10 min pre-incubation of 10  $\mu$ M kavaratamide A (**1**) with the enzymes. Initial rates of substrate hydrolysis were calculated relative to a DMSO control. For each assay, two independent experiments were performed, each in triplicate. Trans-Epoxy succinyl-L-leucylamido(4-guanidino)butane (E-64), at 1  $\mu$ M, was used as an inhibitor control.

**Table S1.** *M. bouillonii* crude extract sample information (Leber et al., 2020).

| Collection Country /Territory | Collection Region | Alias     | Collection code | Collection site                 | Collection date | Filename                  |
|-------------------------------|-------------------|-----------|-----------------|---------------------------------|-----------------|---------------------------|
| India /Lakshadweep            | Kavaratti         | India_KP  | KP-16           | Paradise Hut lagoon             | 2/6/2016        | 2019-08-23_CBN_KP-16-1    |
| India /Lakshadweep            | Kavaratti         | India_KSP | KSP07APR18-1    | south of Paradise Hut pier      | 4/7/2018        | 2019-08-23_CBN_KSP-18-1   |
| India /Lakshadweep            | Kavaratti         | India_KPL | KPL08APR18-1    | Paradise Hut lagoon             | 4/8/2018        | 2019-08-23_CBN_KPL-18-1   |
| India /Lakshadweep            | Kavaratti         | India_KHI | KHT08APR18-3    | Heaven's Treat lagoon           | 4/8/2018        | 2019-08-23_CBN_KHI-18-1   |
| China /Xisha                  | Sanshax           | China_13  | XSSCB2017_13    | 16° 51' 05.52", 112° 20' 56.13" | 5/16/2017       | 20170915_CBN_XSSCB2017_13 |
| China /Xisha                  | Sanshax           | China_24  | XSSCB2017_24    | 16° 51' 05.52", 112° 20' 56.13" | 5/19/2017       | 20170915_CBN_XSSCB2017_24 |
| China /Xisha                  | Sanshax           | China_25  | XSSCB2017_25    | 16° 51' 05.52", 112° 20' 56.13" | 5/19/2017       | 20170915_CBN_XSSCB2017_25 |
| Saipan                        | -                 | Saipan_00 | SPB31JAN13-1    | Laulau Bay                      | 1/31/2013       | 2200                      |
| Saipan                        | -                 | Saipan_09 | SPD29JAN13-6    | Laulau Bay                      | 1/29/2013       | 2209                      |
| Saipan                        | -                 | Saipan_32 | SPB01FEB13-1    | Laulau Bay                      | 2/1/2013        | 2232                      |
| American Samoa                | -                 | AmSam_20  | ASA12JUL14-1    | Afao                            | 7/12/2014       | 2220                      |
| American Samoa                | -                 | AmSam_23  | ASG15JUL14-1    | Fagasa Bay                      | 7/15/2014       | 2223                      |
| Guam                          | -                 | Guam_46   | GBB21MAR16-1    | Apra Harbor                     | 3/21/2016       | 2246                      |
| Guam                          | -                 | Guam_47   | GGG21MAR16-1    | Apra Harbor                     | 3/21/2016       | 2247                      |
| Papua New Guinea              | New Ireland       | PNG_c     | PNG19MAY05-8    | Pigeon Island                   | 5/19/2005       | Mb                        |

**Table S2.** Antitrypanosomal activity screening results of kavaratamide A (**1**)

| <b>Compound</b>             | <b>% inhibition <i>T. b. brucei</i><br/>(4 <math>\mu</math>M)</b> | <b>% inhibition <i>Tbr</i>CATL<br/>(10 <math>\mu</math>M)</b> | <b>% inhibition cruzain<br/>(10 <math>\mu</math>M)</b> |
|-----------------------------|-------------------------------------------------------------------|---------------------------------------------------------------|--------------------------------------------------------|
| Kavaratamide A ( <b>1</b> ) | 28 $\pm$ 5                                                        | 0 $\pm$ 3                                                     | 0 $\pm$ 2                                              |
| Pentamidine*                | 100 $\pm$ 1                                                       | NA                                                            | NA                                                     |
| E-64 (1 $\mu$ M)**          | NA                                                                | 99 $\pm$ 0                                                    | 97 $\pm$ 2                                             |

NA: not applicable. \*Positive control for *T. b. brucei* assay; \*\* Positive control for enzymatic assay.

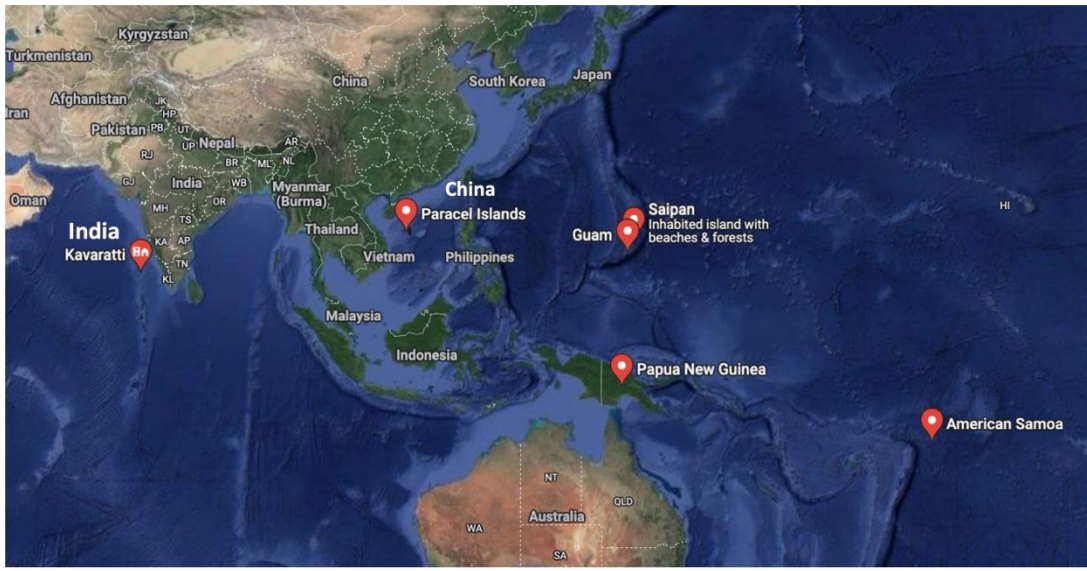

**Figure S1.** Map of collection sites of *M. bouillonii*



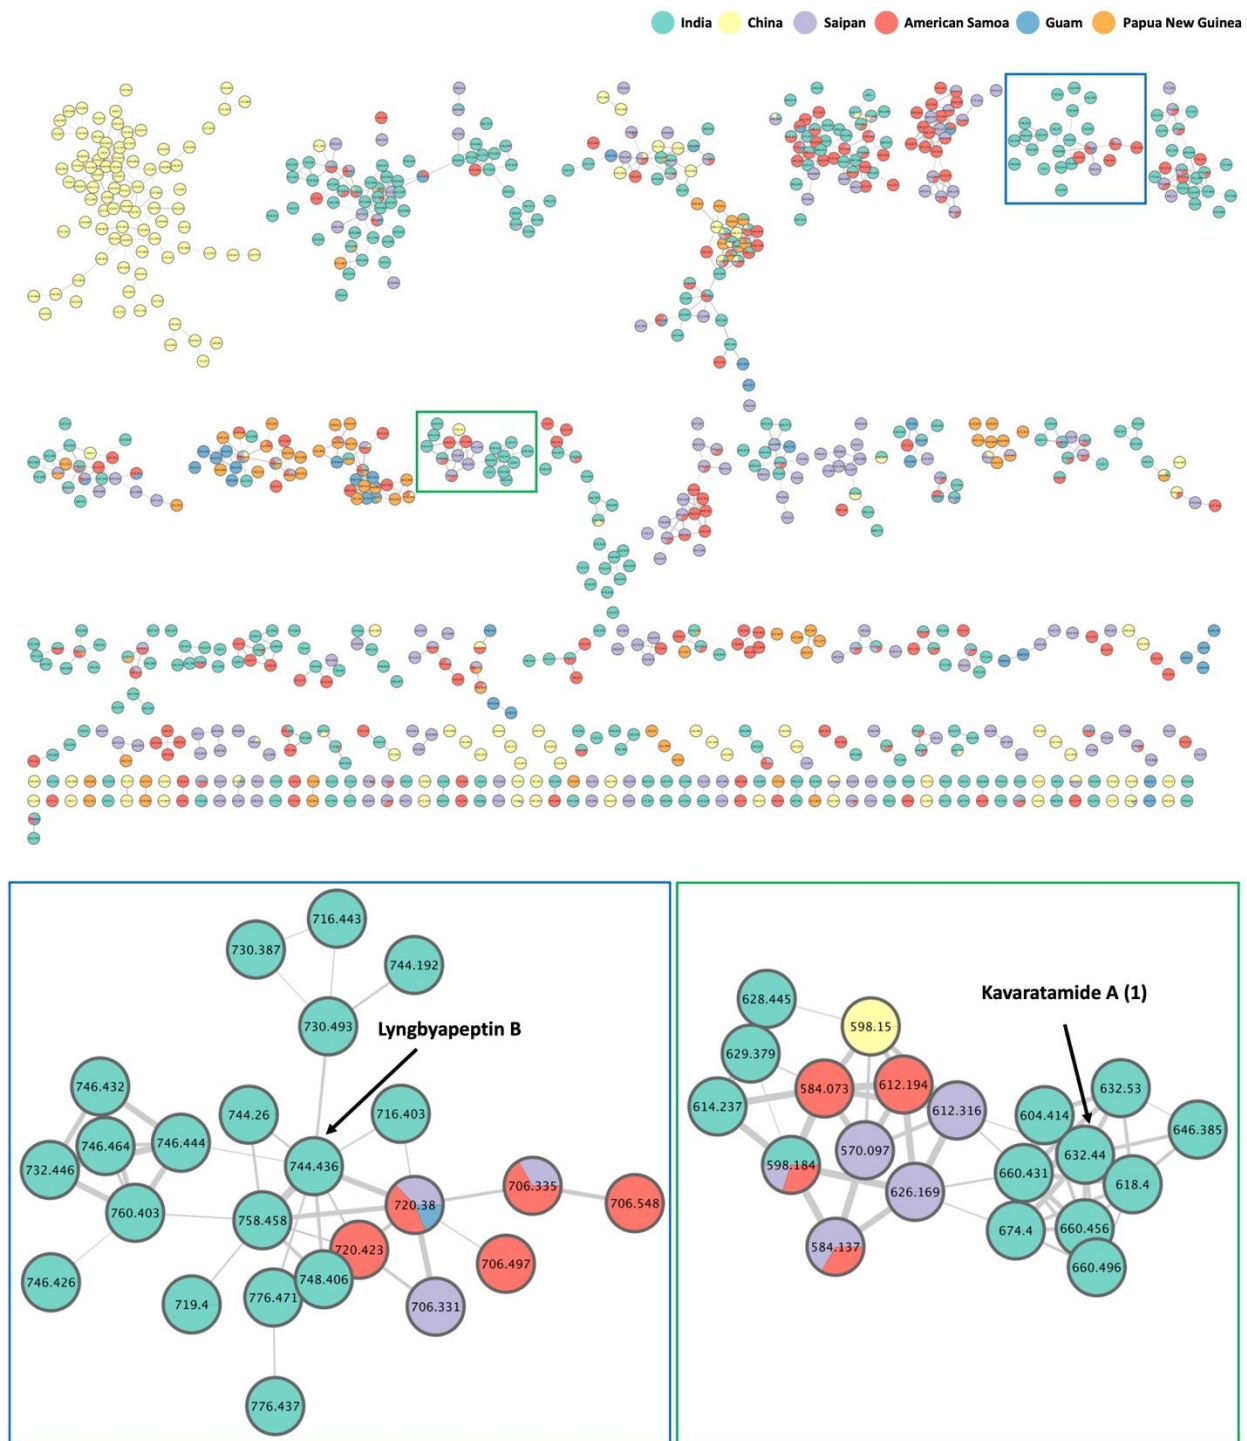

**Figure S2.** Molecular network of 15 *M. bouillonii* extracts collected from six different locations. The clusters possessing at least two nodes B appear in this figure.

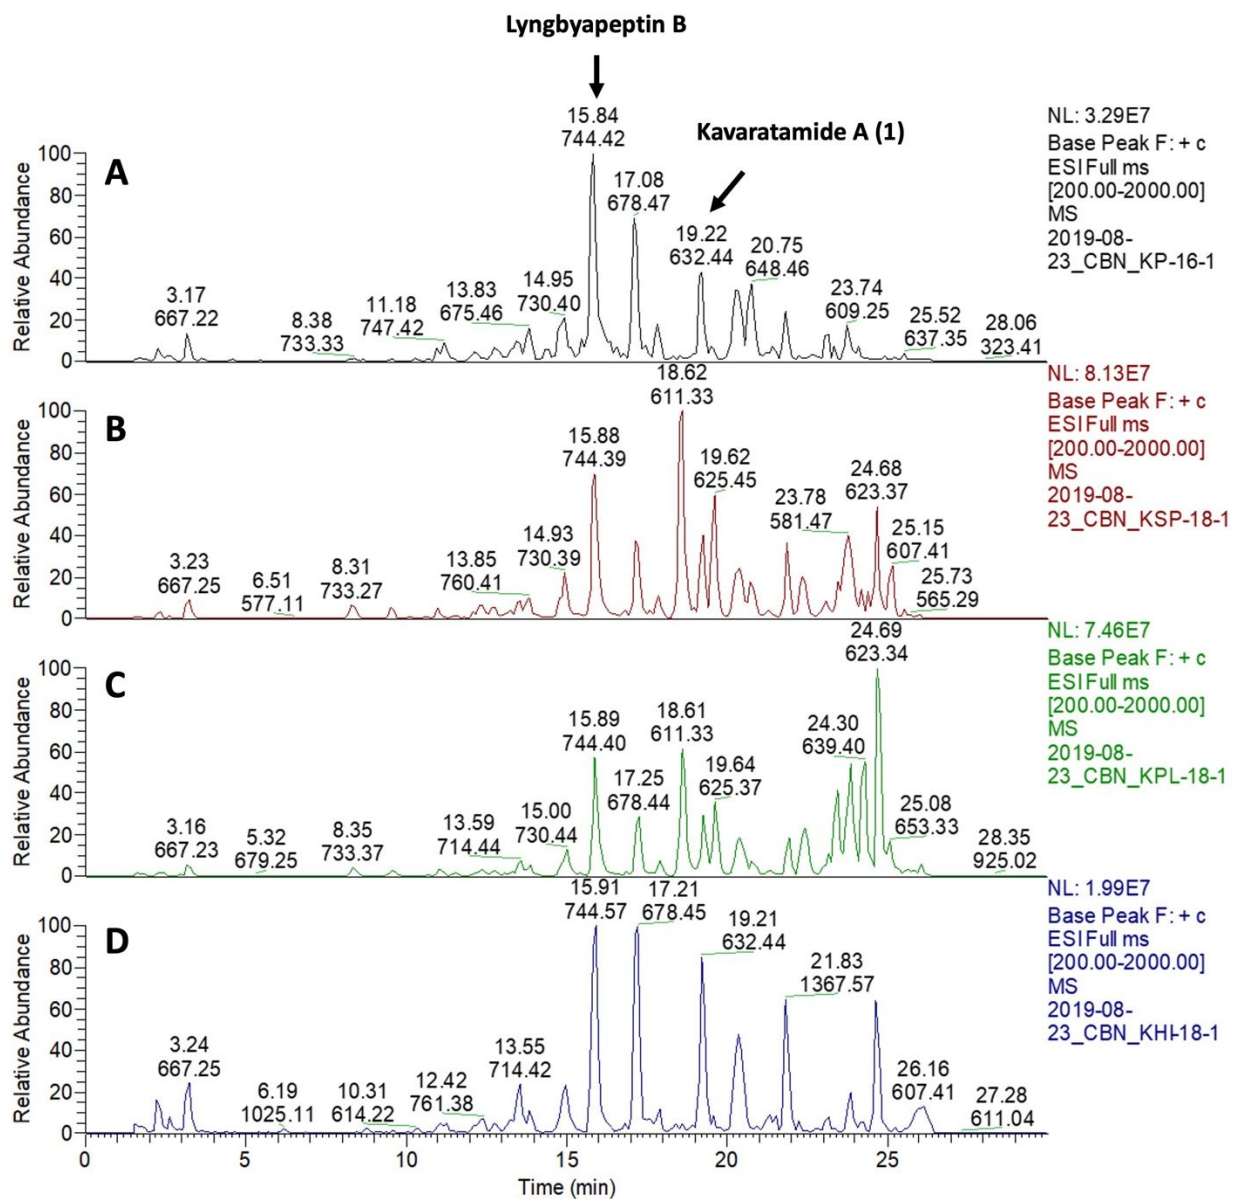

**Figure S3.** LR-LCMS trace of four different *M. bouillonii* extracts from India. The collection codes are as follow: (A) KP-16, (B) KSP07APR18-1, (C) KPL08APR18-1, and (D) KHT08APR18-3.

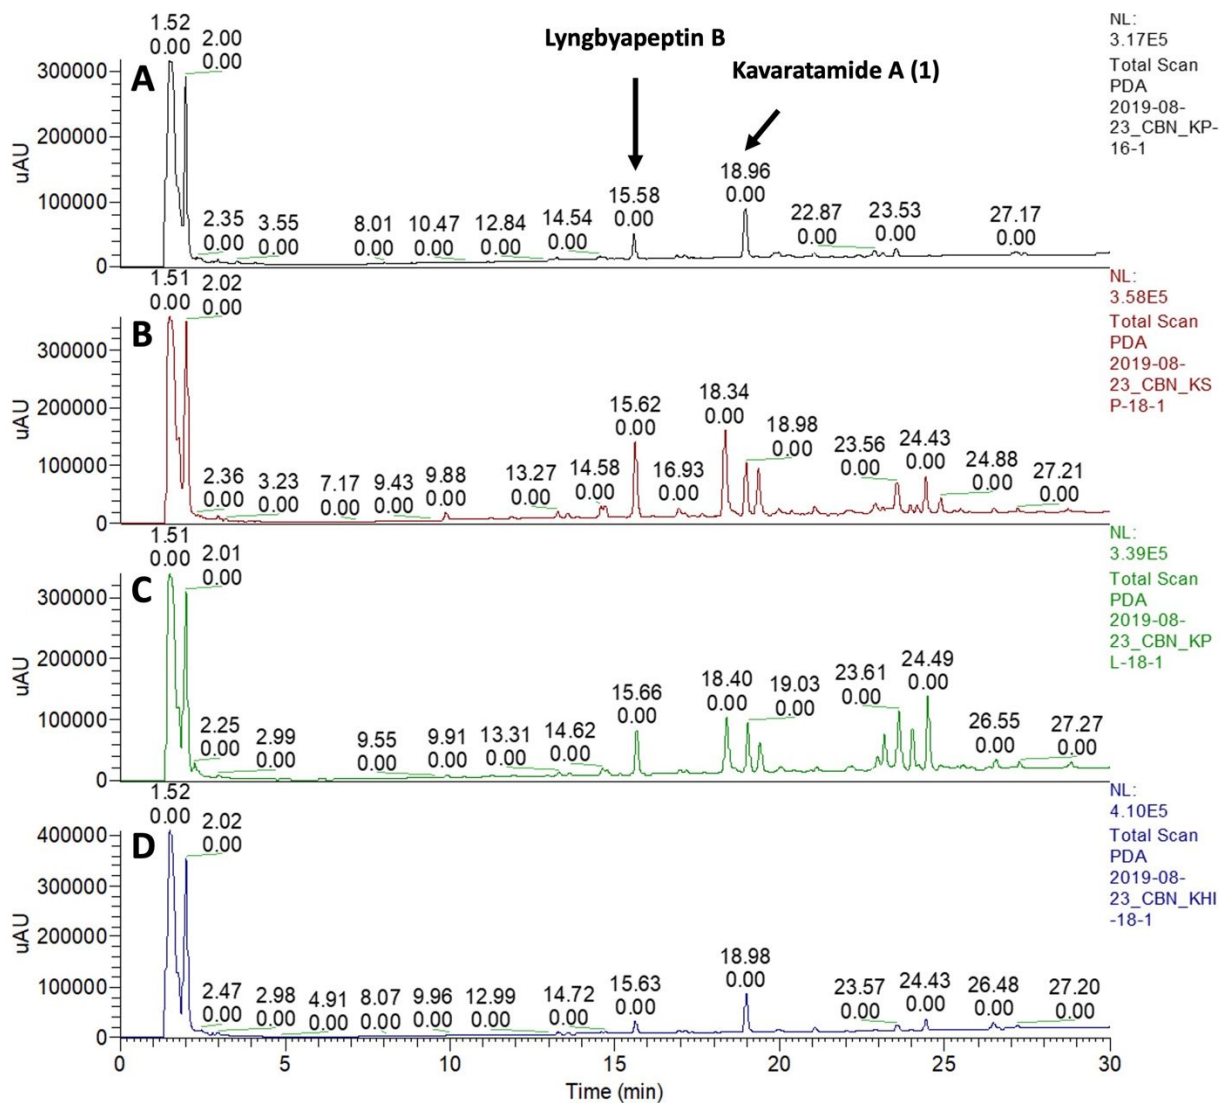

**Figure S4.** DAD trace of four different *M. bouillonii* extracts from India. The collection codes are as follow: (A) KP-16, (B) KSP07APR18-1, (C) KPL08APR18-1, and (D) KHT08APR18-3. The peak at 15.58 min and 18.96 min are lyngbyapeptin B and kavaratamide A (1), respectively.

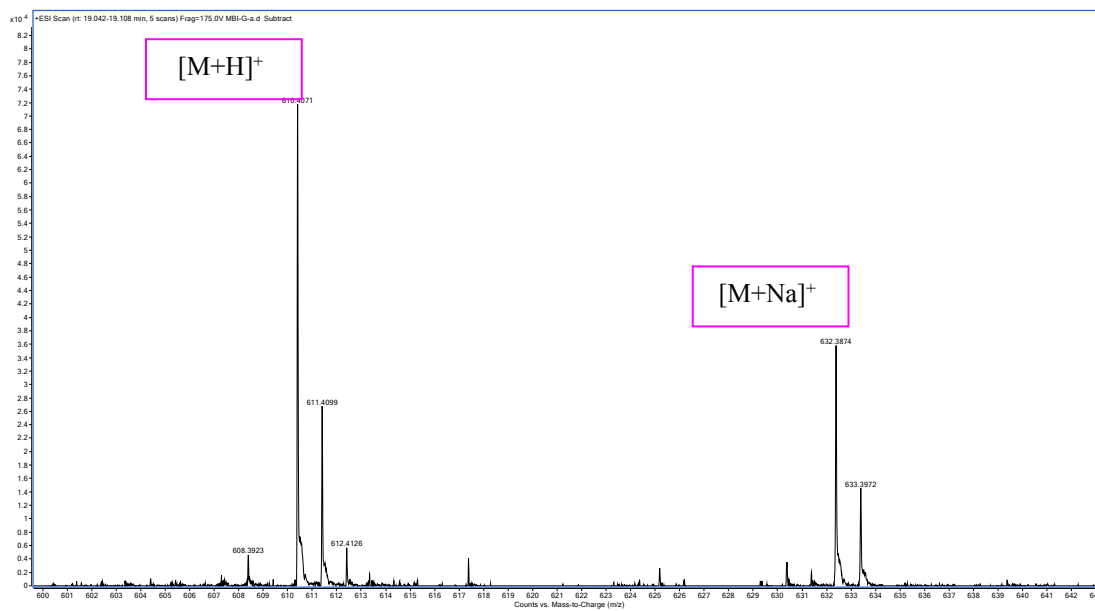

| Mass Measured | Theo. Mass | Delta (ppm) | Composition                |
|---------------|------------|-------------|----------------------------|
| 610.4071      | 610.4062   | 1.5         | $[C_{32}H_{56}N_3O_8]^+$   |
| 632.3874      | 632.3881   | -1.1        | $[C_{32}H_{55}N_3O_8Na]^+$ |

**Figure S5.** HRESI(+)-MS spectrum of kavaratamide A (**1**).

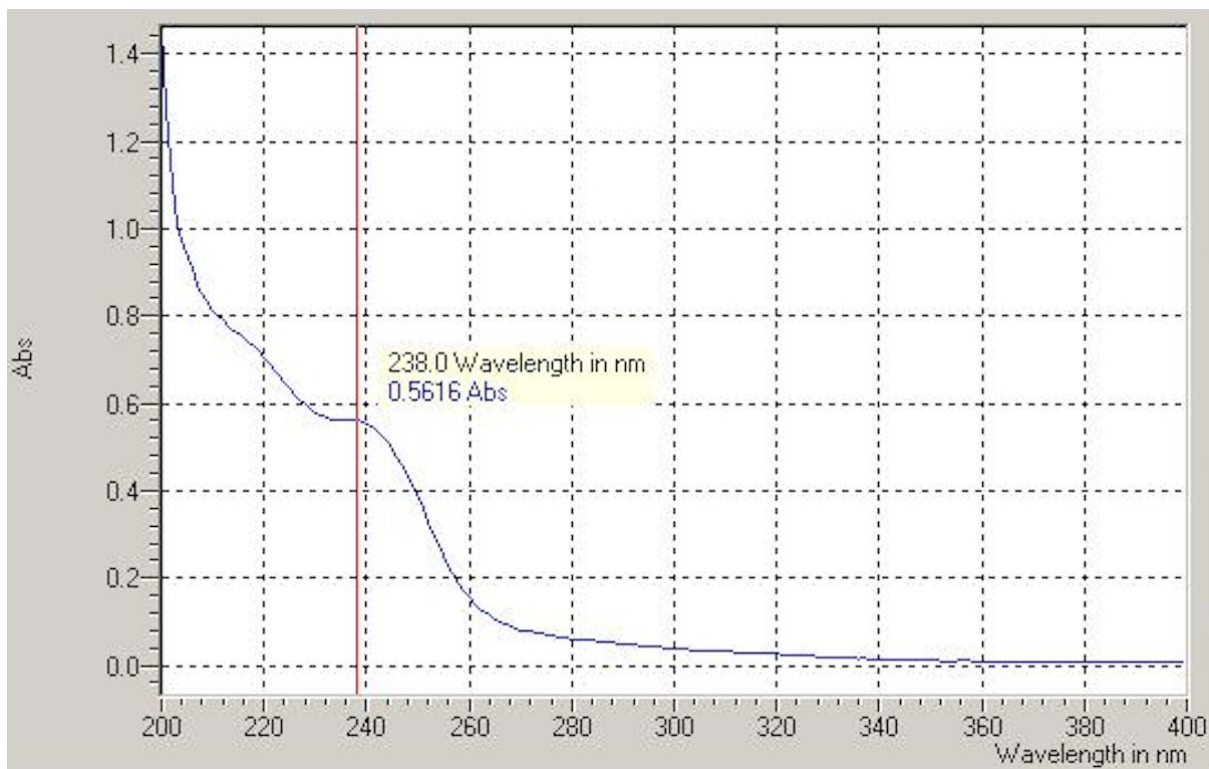

**Figure S6.** UV spectrum of kavaratamide A (**1**).

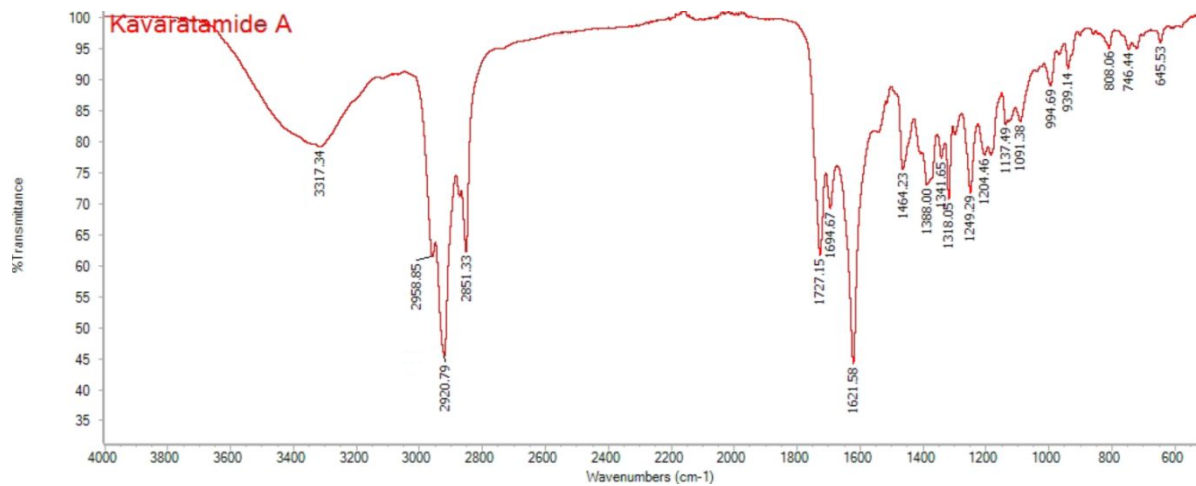

Figure S7. IR spectrum of kavaratamide A (1) (ATR).

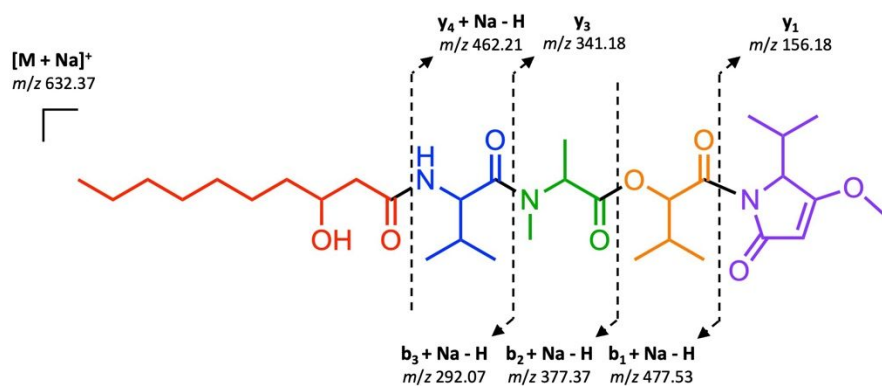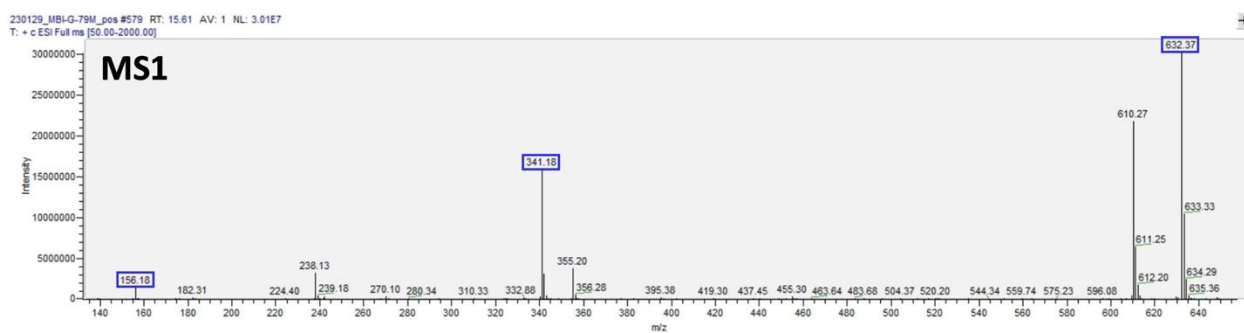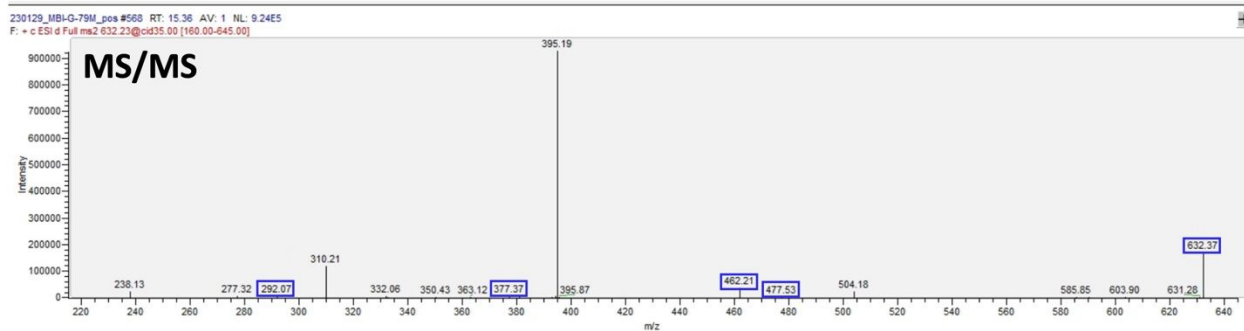

**Figure S8.** MS/MS fragmentation of kavaratamide A (1).



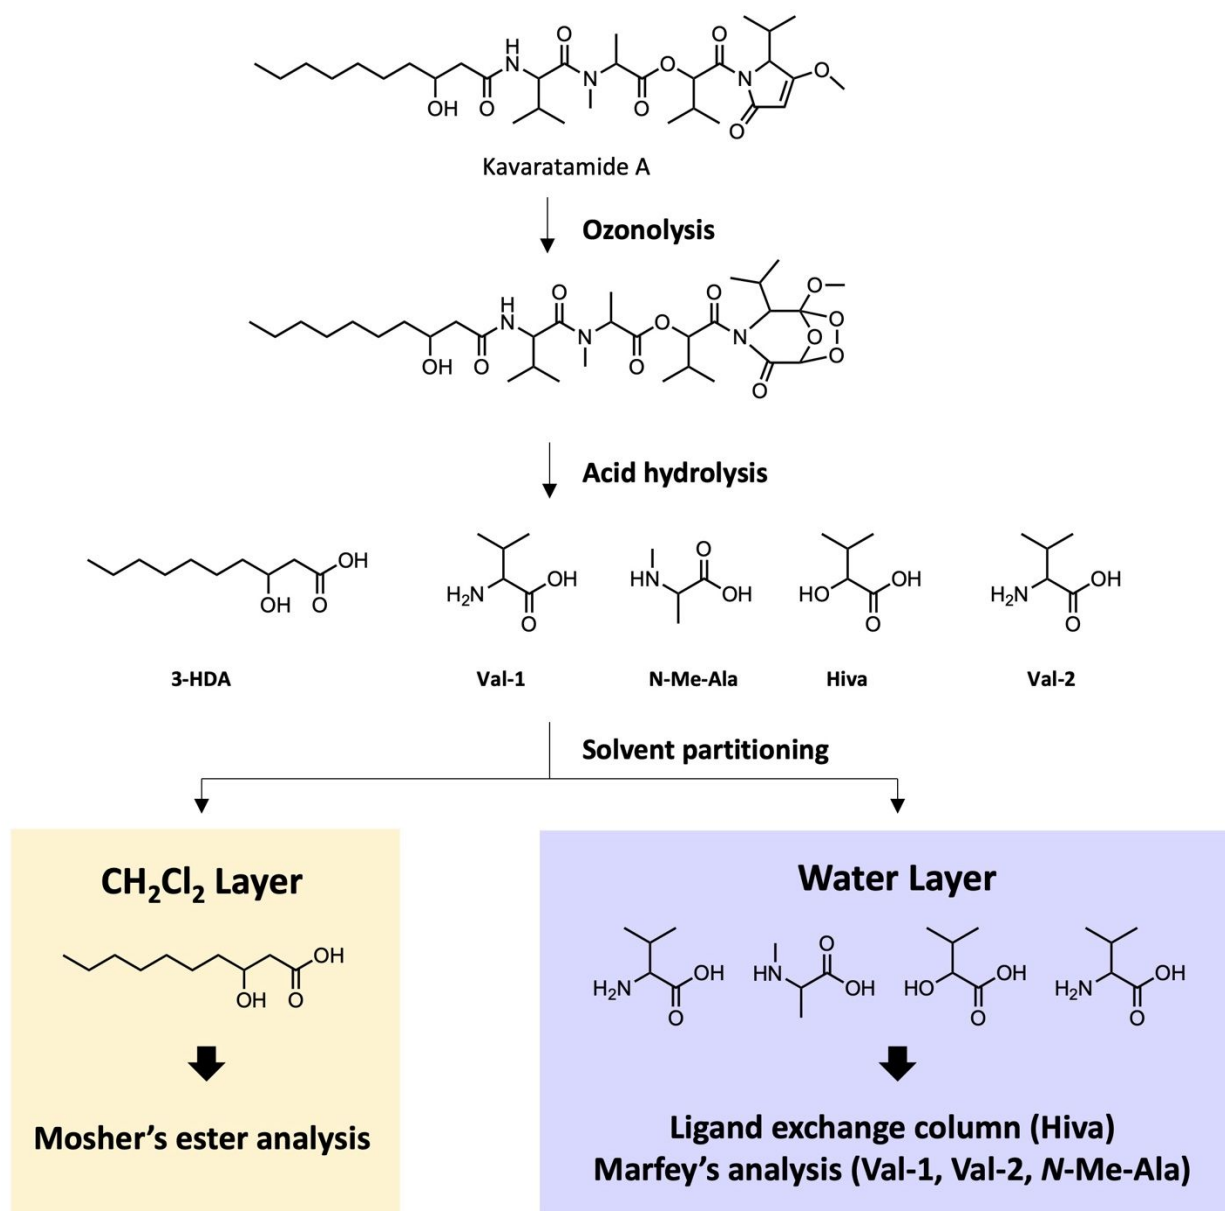

**Figure S9.** Scheme for absolute configuration determination of kavaratamide A (1).



## Modified Mosher's ester analysis strategy

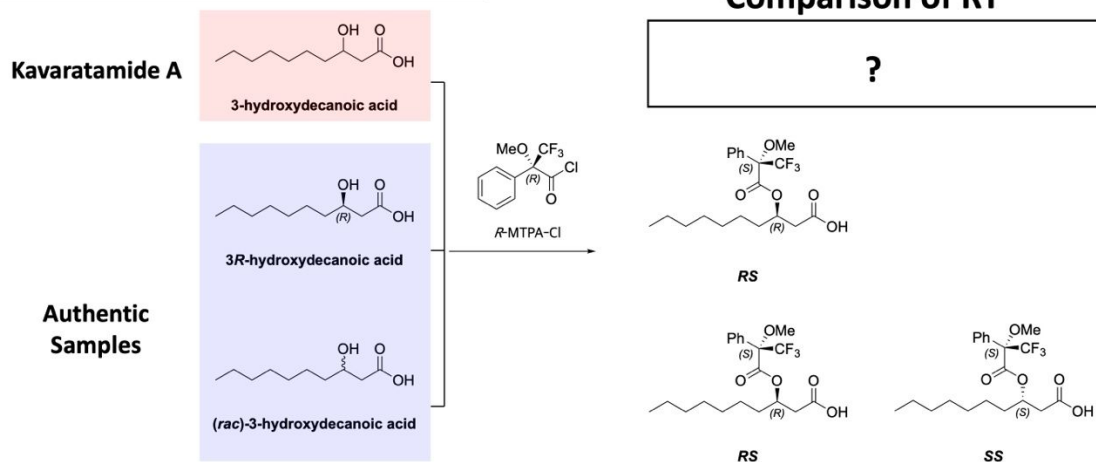

## MS Chromatogram

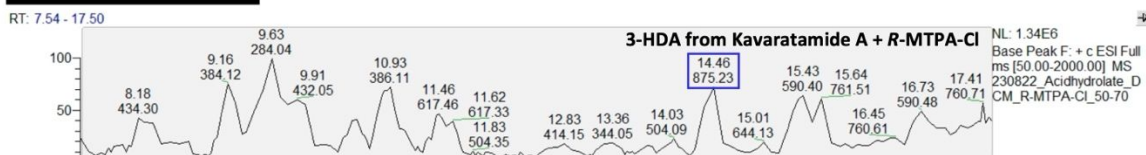

## UV Chromatogram (254 nm)

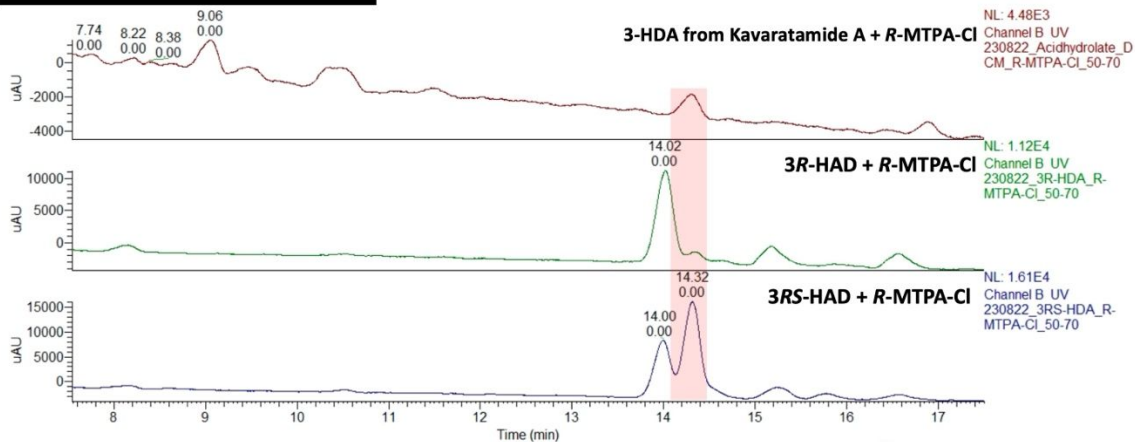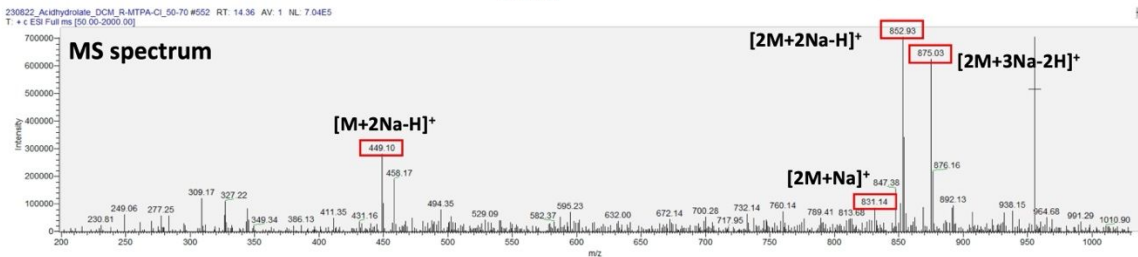

Figure S10. Modified Mosher's ester analysis of kavaratamide A (**1**).

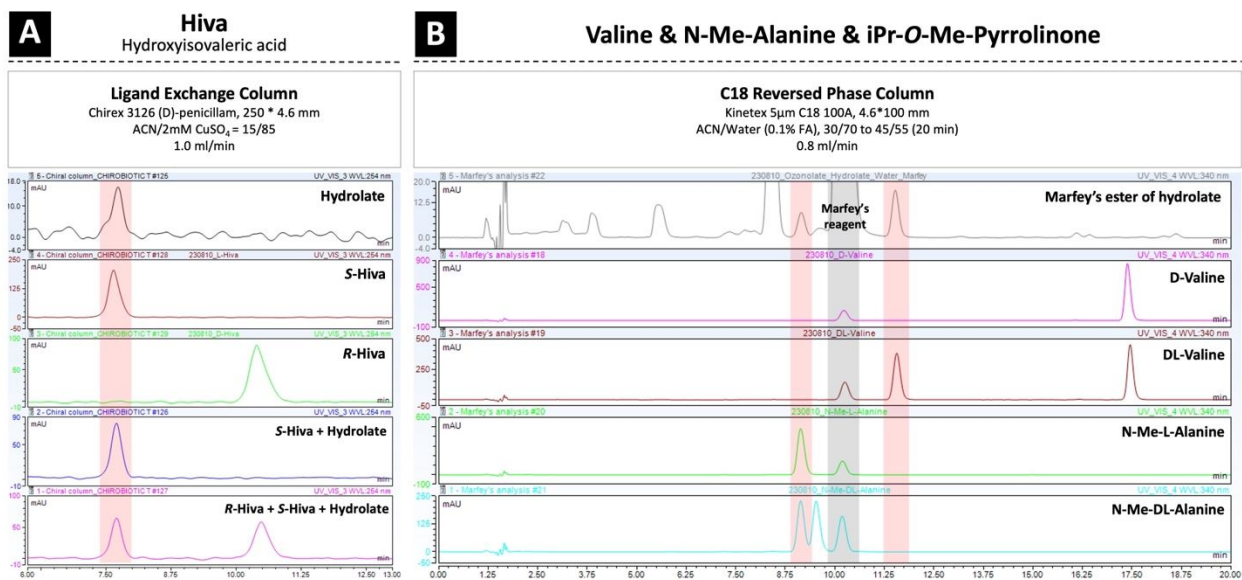

**Figure S11.** (A) Chiral phase chromatographic analysis for Hiva and (B) HPLC chromatogram of advance Marfey's analysis for Val-1, Val-2, and *N*-Me-Ala.

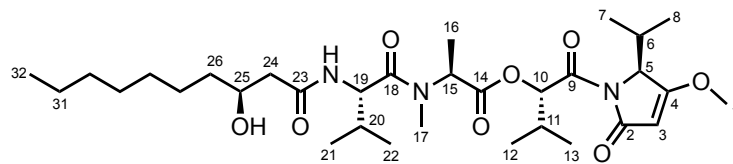

Kavaratamide A (1)

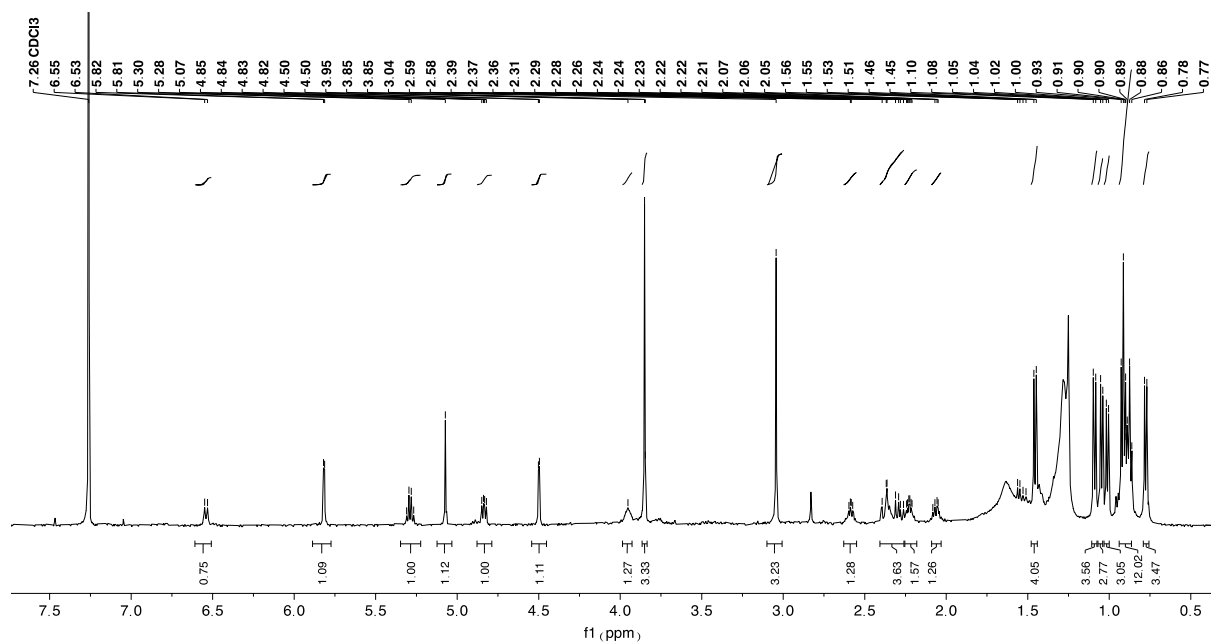

Figure S12. <sup>1</sup>H NMR spectrum of kavaratamide A (1) in CDCl<sub>3</sub> (500 MHz).

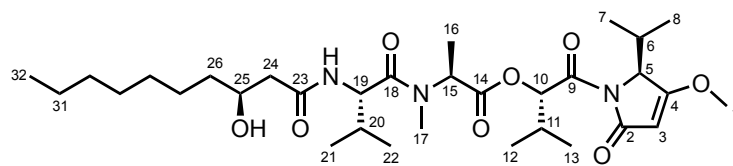

Kavaratamide A (1)

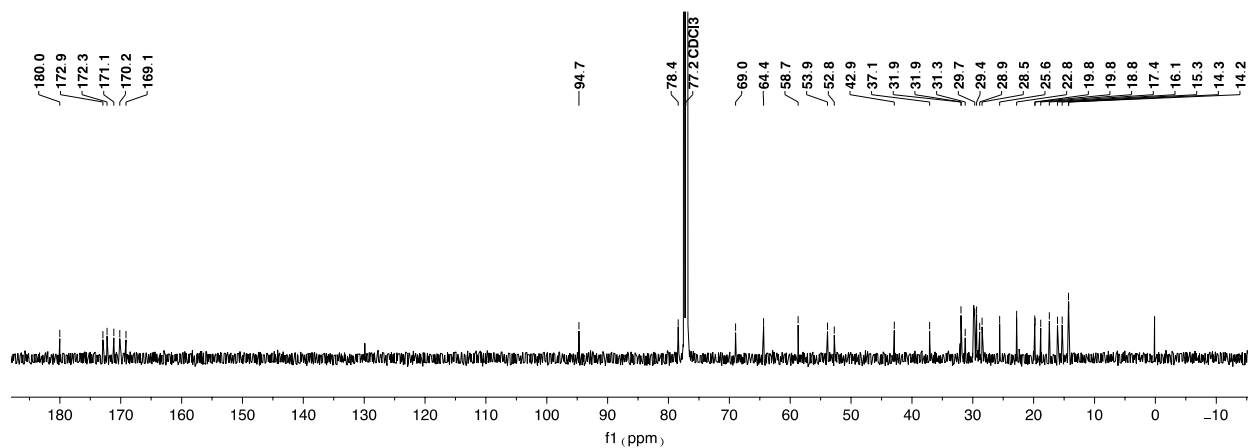

Figure S13. <sup>13</sup>C NMR spectrum of kavaratamide A (1) in CDCl<sub>3</sub> (125 MHz).



Kavaratamide A (1)

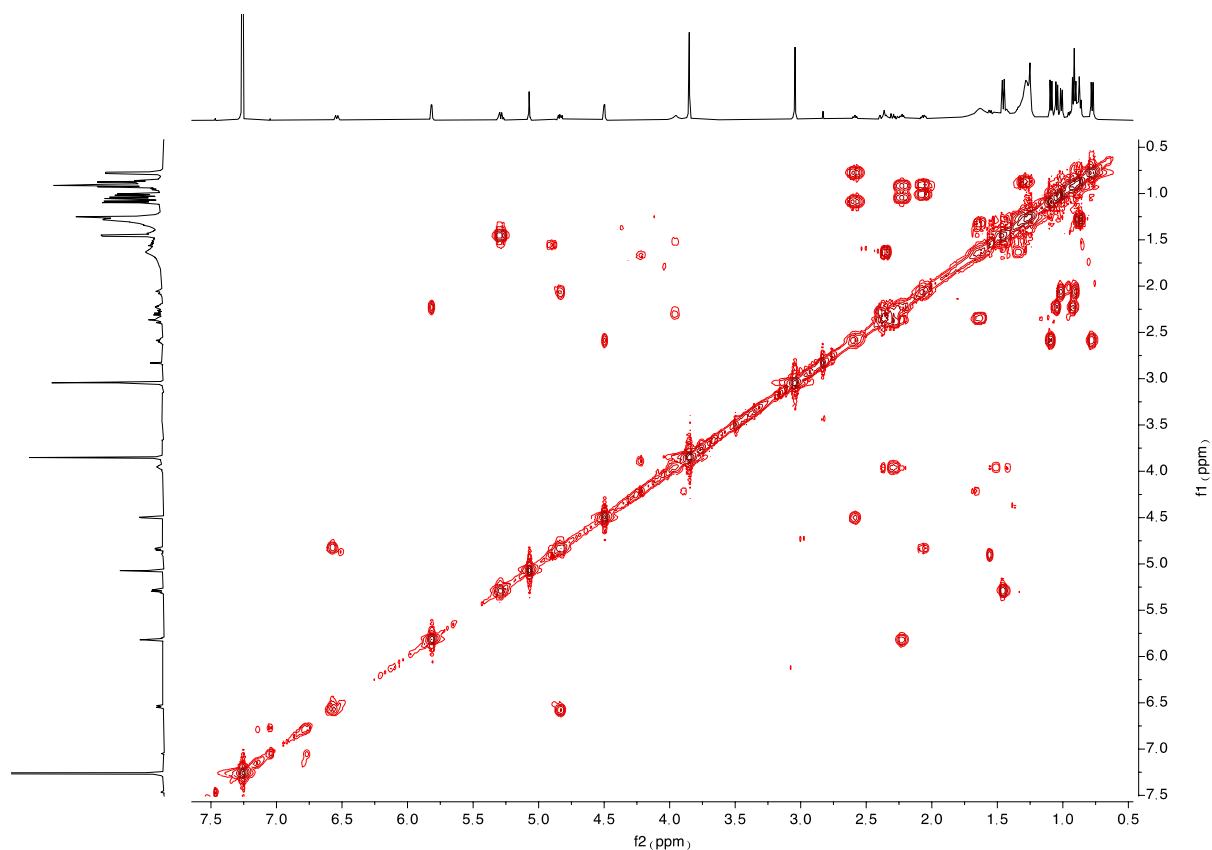

Figure S14. COSY spectrum of kavaratamide A (1) in CDCl<sub>3</sub> (500 MHz).



Kavaratamide A (1)

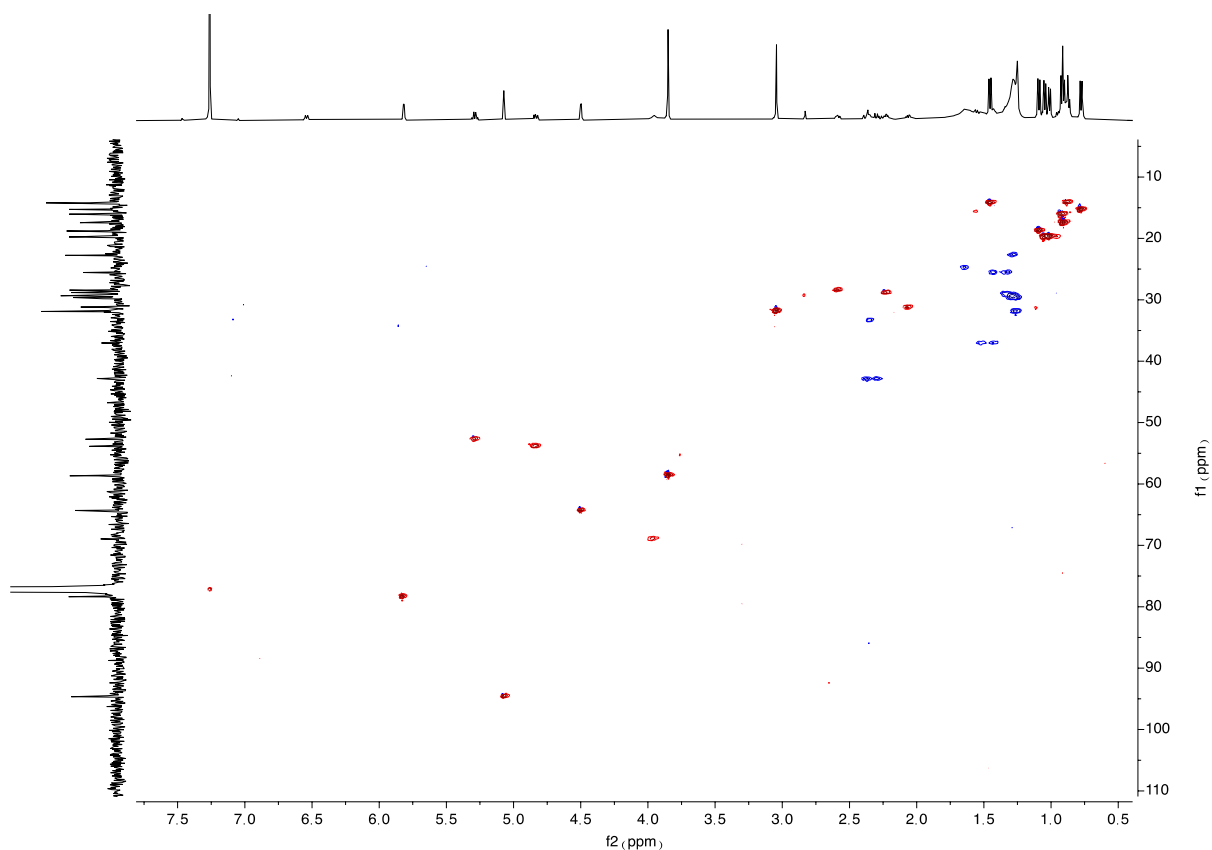

Figure S15. HSQC spectrum of kavaratamide A (1) in  $\text{CDCl}_3$  (600 MHz).

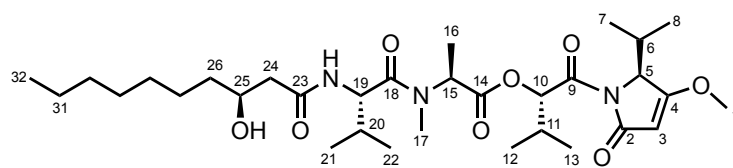

Kavaratamide A (1)

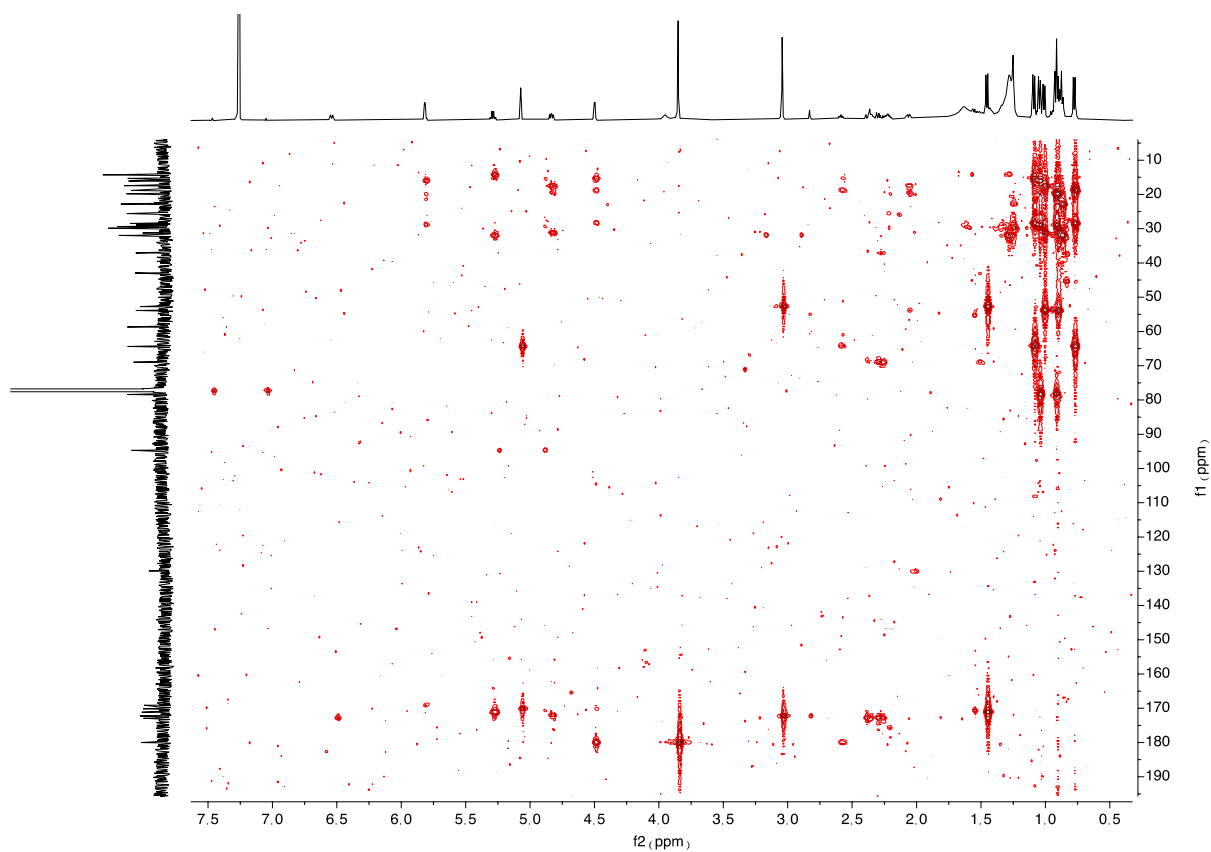

Figure S16. HMBC spectrum of kavaratamide A (1) in  $\text{CDCl}_3$  (500 MHz).



Kavaratamide A (1)

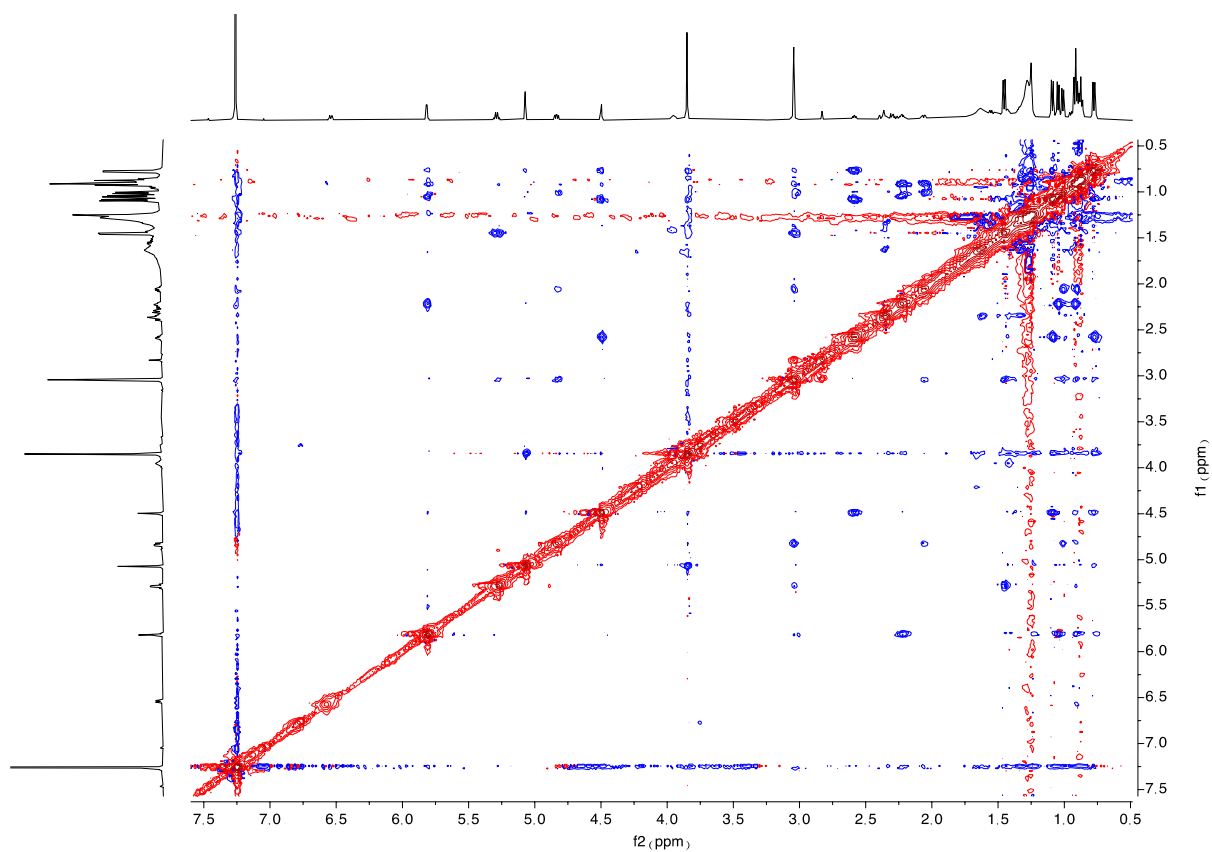

Figure S17. NOESY spectrum of kavaratamide A (1) in CDCl<sub>3</sub> (500 MHz).



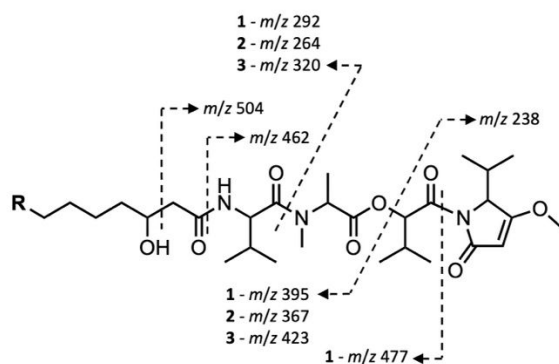

| Compound           | R                             | Fatty acid moiety        |
|--------------------|-------------------------------|--------------------------|
| Kavaratamide A (1) | $-(\text{CH}_2)_2\text{CH}_3$ | 3-Hydroxydecanoic acid   |
| Kavaratamide B (2) | $-\text{CH}_3$                | 3-Hydroxyoctanoic acid   |
| Kavaratamide C (3) | $-(\text{CH}_2)_4\text{CH}_3$ | 3-Hydroxydodecanoic acid |

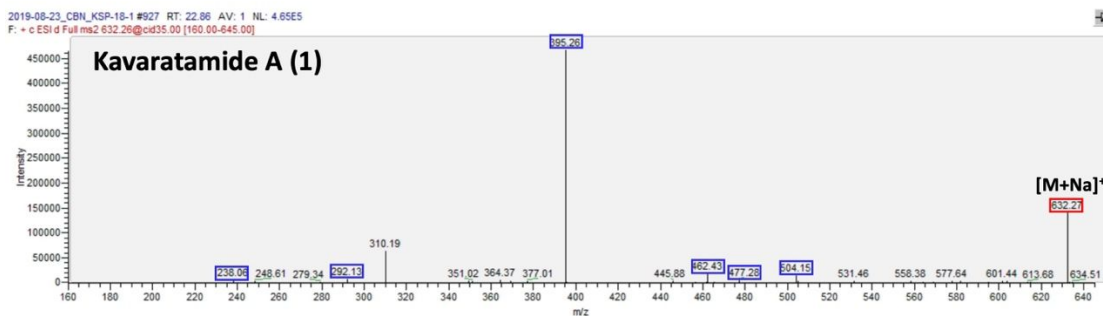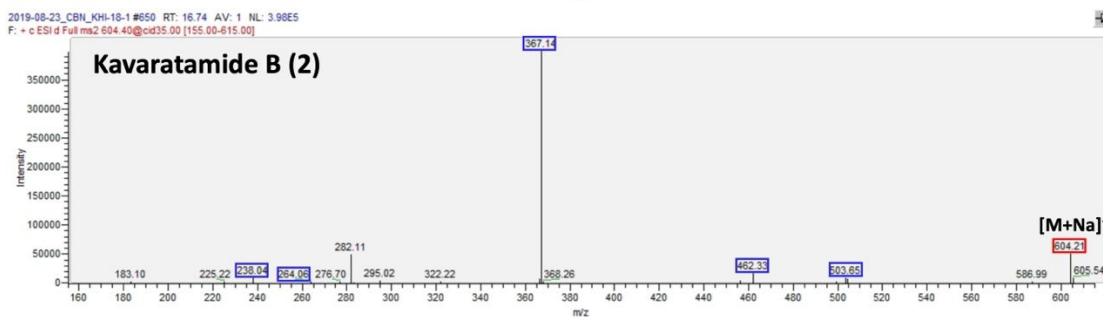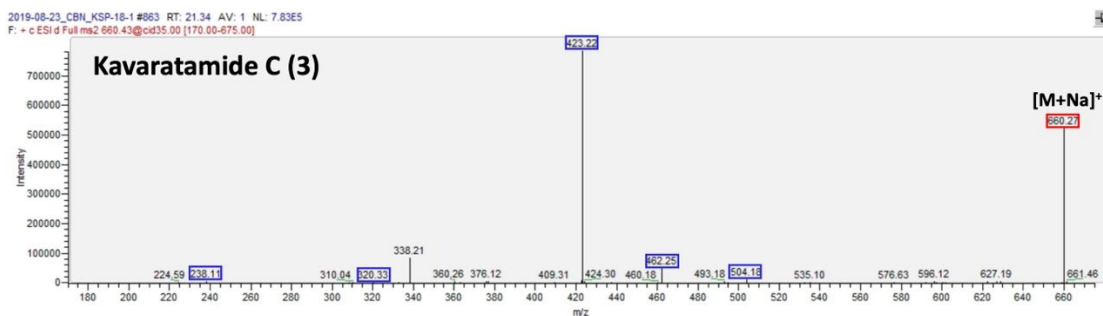

Figure S18. MS/MS spectra of kavaratamides A–C (1–3).

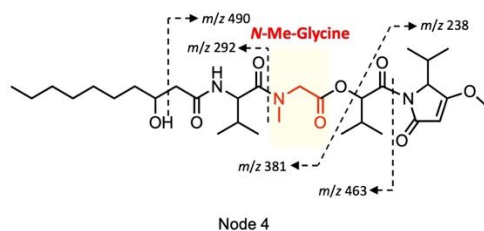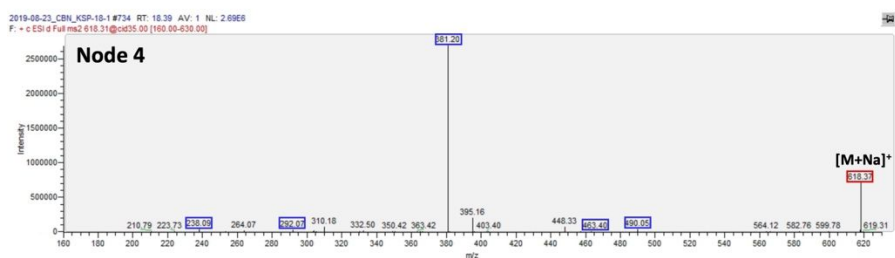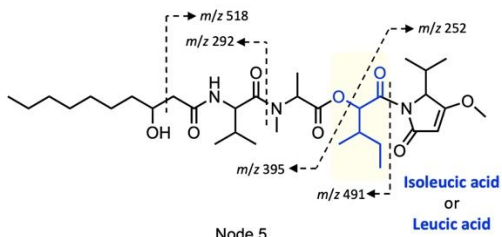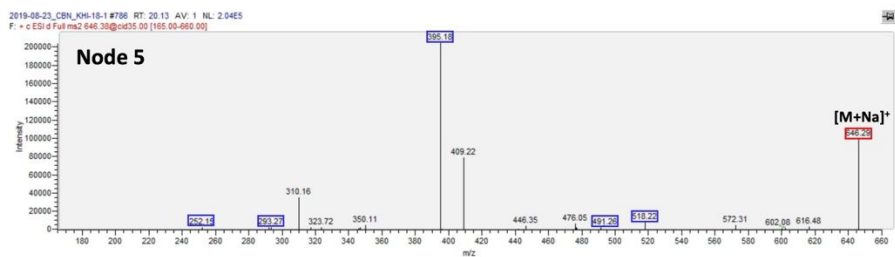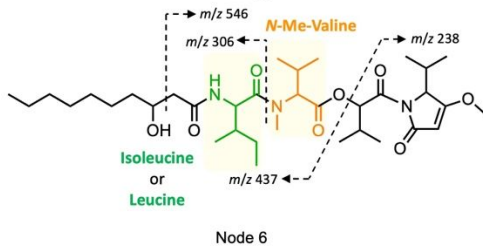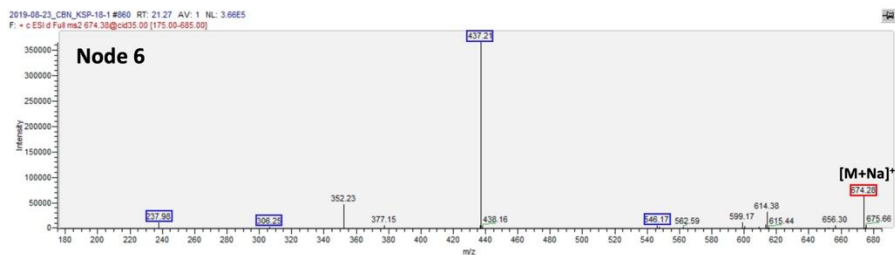

Figure S19. MS/MS spectra of Nodes 4–6.

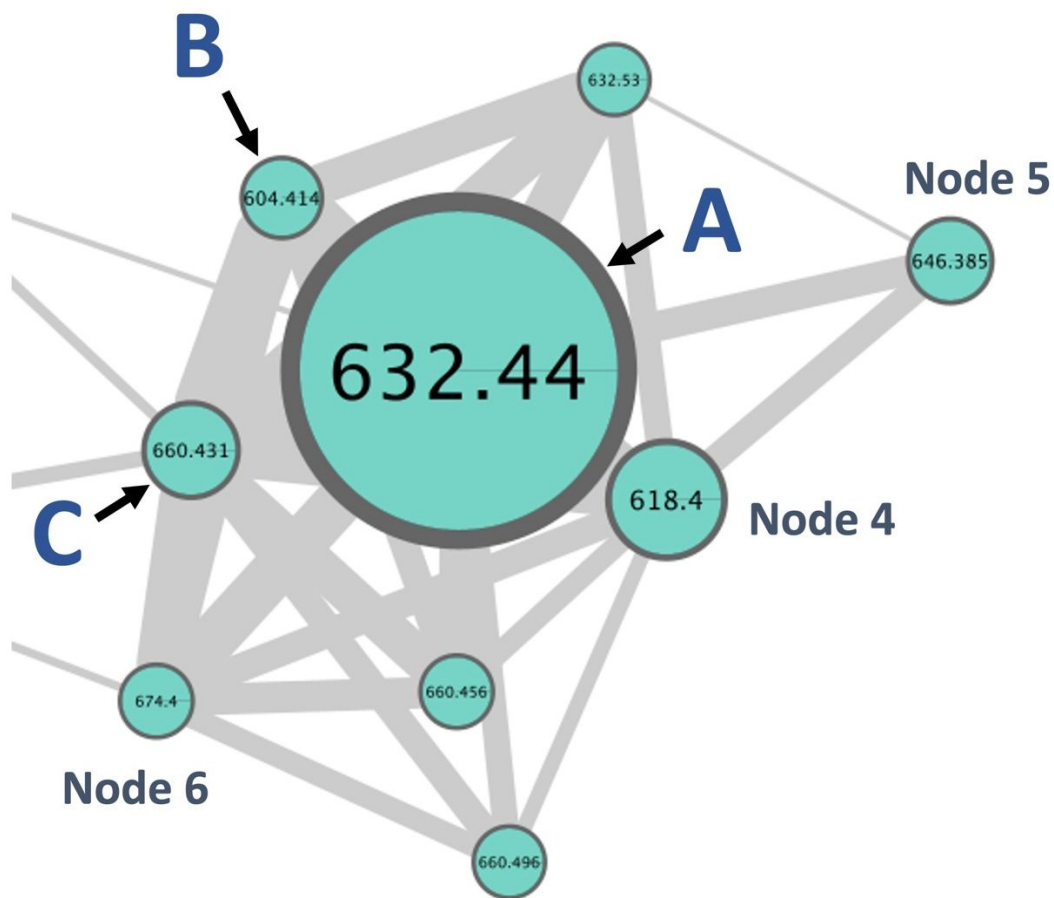

|                      | parent mass | sum(precursor intensity) |
|----------------------|-------------|--------------------------|
| Kavaratamide A (1) → | 632.44      | 7.87173E7                |
| Node 4 →             | 618.4       | 1.34428E7                |
| Kavaratamide C (3) → | 660.431     | 7018440.0                |
| Node 5 →             | 646.385     | 3984970.0                |
| Kavaratamide B (2) → | 604.414     | 2836670.0                |
| Node 6 →             | 674.4       | 712262.0                 |
|                      | 660.456     | 657864.0                 |
|                      | 660.496     | 344966.0                 |
|                      | 632.53      | 151167.0                 |

**Figure S20.** Kavaratamides MS/MS-based cluster with the sums of the intensities of the precursor ions of each compound used to determine their relative abundance. These sums were used to depict the node sizes.

### Kavaratamide A in D283-med

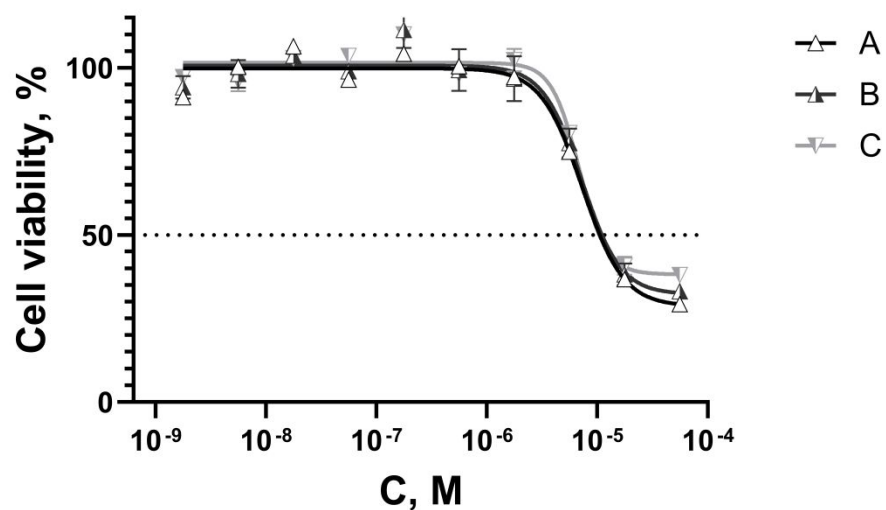

|      | A          | B          | C          |
|------|------------|------------|------------|
| IC50 | 7.308e-006 | 7.233e-006 | 6.852e-006 |

### Quisinostat in D283-med

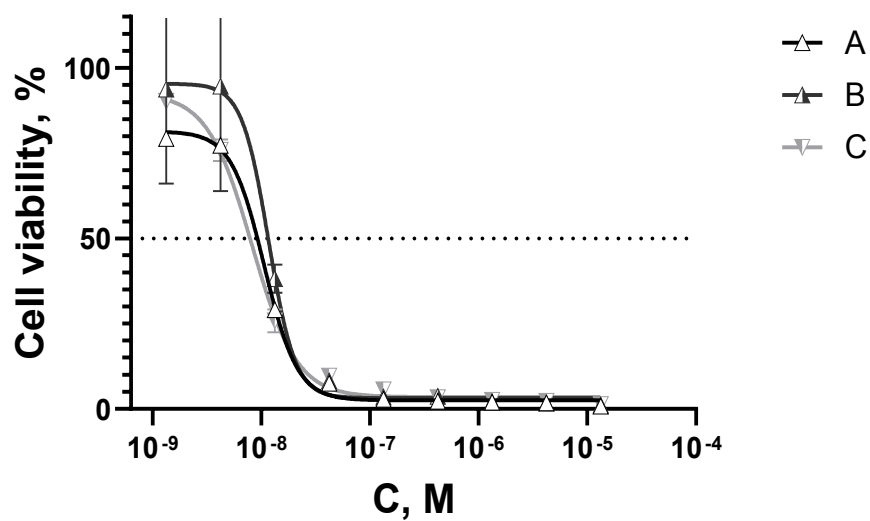

|      | A          | B          | C          |
|------|------------|------------|------------|
| IC50 | 1.065e-008 | 1.167e-008 | 8.213e-009 |

**Figure S21.** Concentration response curves of cell viability for D283-med cells treated with kavaratamide A (1)(top) and positive control quisinostat (bottom).

## References:

- Hirumi, H; Hirumi, K. Continuous cultivation of *Trypanosoma brucei* blood stream forms in a medium containing a low concentration of serum protein without feeder cell layers. *J. Parasitol.* **1989**, 75, 985-989.
- Faria, J; Moraes, CB; Song, R; Pascoalini, BS; Lee, N; Siqueira-Neto, JL; Cruz, DJM; Parkinson, T; Ioset, JR; Cordeiro-da-Silva, A; Freitas-Junior, LH. Drug discovery for human African trypanosomiasis: identification of novel scaffolds by the newly developed HTS SYBR Green assay for *Trypanosoma brucei*. *J. Biomol. Screen.* **2015**, 20, 70-81.
- Silva, EB; Dall, E; Briza, P; Brandstetter, H; Ferreira, RS. Cruzain structures: apocruzain and cruzain bound to S-methyl thiomethanesulfonate and implications for drug design. *Acta Crystallogr., Sect. F: Struct. Biol. Commun.* **2019**, 75, 419-427.
- Caffrey, CR; Hansell, E; Lucas, KD; Brinen, LS; Alvarez Hernandez, A; Cheng, J; Gwaltney, SL; Roush, WR; Stierhof, YD; Bogyo, M; Steverding, D; McKerrow, JH. Active site mapping, biochemical properties and subcellular localization of rhodesain, the major cysteine protease of *Trypanosoma brucei rhodesiense*. *Mol. Biochem. Parasitol.* **2001**, 118, 61-73.
- Leber, C. A.; Naman, C. B.; Keller, L.; Almaliti, J.; Caro-Diaz, E. J. E.; Glukhov, E.; Joseph, V.; Sajeevan, T. P.; Reyes, A. J.; Biggs, J. S. Applying a Chemogeographic Strategy for Natural Product Discovery from the Marine Cyanobacterium *Moorena bouillonii*. *Mar. Drugs* **2020**, 18, 515.
